# Supplementary material for: miRNA-940 reduction contributes to human Tetralogy of Fallot development
Source: PubMed Central journal article supplement (PMC4196658; doi:10.1111/jcmm.12309), 2014-06-01
Supplement: jcmm0018-1830-SD1.pdf [file jcmm0018-1830-SD1.pdf]

# Supplementary Materials

## Supplemental Methods

**Human tissue preparation.** Individual permission using standard informed consent procedures was obtained. The tissues were permitted to be used by the Key Laboratory of Basic Research in Cardiology of the Ministry of Education of China, Tongji University School of Medicine. The investigation conforms to the principles outlined in the Declaration of Helsinki regarding the use of human tissues. The tissues were immediately snap-frozen in liquid nitrogen upon collecting and stored at -80°C until further analysis.

**miRNA expression analysis.** As a preliminary screen and to obtain general trends for miRNA abundance in heart, total RNA of human heart, human pancreas, and human lung (Applied Biosystems, USA), three main organs derived from mesoderm, were analyzed using commercially available miRNA arrays (LC Sciences, Houston, TX) based on miRBase Release 15.

A stem-loop qRT-PCR assay based on SYBR Green I was performed to compare the distribution of miRNA-940 and other well-known cardiac specific/enriched miRNAs including miRNA-1, miRNA-133a, miRNA-133b, miRNA-208a, miRNA-208b, miRNA-499-5p, and miRNA-499-3p in human left atrium (LA), right atrium (RA), left ventricle (LV), right ventricle (RV) and right ventricular outflow tract. The down-regulation of miRNA-940 in TOF was also validated using this qRT-PCR assay in independent tissue samples (right ventricular outflow tract) of

patients with TOF. Following the manufacturer's instruction, cDNA was synthesized using the miScript Reverse Transcription (RT) Kit (Qiagen GmbH, Hilden, Germany). Briefly, 1 µg total RNA, 1 µl miScript Reverse Transcriptase Mix, and 4 µl miScript RT buffer were mixed well and incubated for 60 min at 37 °C. The qRT-PCR was performed on an Mx3000 QPCR System (Stratagene, La Jolla, CA) using the miScript SYBR Green PCR Kit (Qiagen, Valencia, CA). 20 µL PCR reaction system contained 2 µl RT product, 10 µl 2× QuantiTect SYBR Green PCR Master Mix, 2 µl 10× miScript Universal Primer, 2 µl 10× miScript Primer Assay (Qiagen), and 4µl nuclear-free water. The reaction protocol was as follows: 95 °C for 10 min, followed by 40 amplification cycles of 94 °C for 15 s, 55 °C for 30 s, and 70 °C for 30 s. All qRT-PCR reactions, including no-template controls, were performed in triplicate. The relative expression ratios of miRNAs were determined with the crossing point as the cycle number. A highly conserved and universally expressed small nRNA, U6, was used as endogenous controls. The qRT-PCR products were analyzed by melting curve analysis.

For the analysis of miRNA array data, a t-test was used to determine whether there were any significant miRNA expression differences between TOF patients and healthy controls. P-values < 0.05 were considered statistically significant. Significant data were further analyzed by clustering and expression profiles were visualized with GeneSpring 10.0 (Agilent Technology). For qRT-PCR analysis, the relative expression level for each miRNA or mRNA was calculated using the  $2^{-\Delta\Delta C_t}$  method. To account for possible differences input amount, miRNA expression was normalized to

*U6* while mRNAs expression was normalized to *GAPDH*.

**Primer sequences for gene expression detection.**

MEF2C (F-5-agatacccacaacacaccacgcgcc-3; R-5-atccttcagagagtcgcatgcgctt-3);

GATA-4 (F-5-gacaatctggttaggggaagc-3; R-5-accagcagcagcgaggagat-3);

Nkx-2.5 (F-5-cgccgctccagttcatag-3; R-5-ggtggagctggagaagacaga-3);

TropT (F-5-gtgggaagagggcagactgag-3; R-5-atagatgctctgccacagc-3);

bMHC (F-5-gaagcccagcacatcaaaag-3; R-5-gatcaccaacaaccctacg-3);

cActin (F-5-tcctgatgcgcatttttattc-3; R-5-aacaccaactgctctagccacg-3);

$\alpha$ -SMA (F-5-ccagctatgtgaagaagaagagg-3; R-5-gtgatctccttctgcattcggt-3);

calponin (F-5-ttttgaggccaacgacctgt-3; R-5-tccttcgtcttcgcatg-3) ;

**Flow Cytometry for apoptosis and necrosis detection.** Apoptosis and necrosis were detected by staining for Annexin V and PI (Roche, Switzerland) as previously described [1]. In Brief,  $10^6$  cells were washed with PBS and centrifuged at 200 g for 5 min. After that, the cell pellet was re-suspended in 100  $\mu$ l of Annexin-VFLUOS labeling solution and incubated at 25°C for 15 min. Then 0.5 ml incubation buffer was added and the mixture was analyzed on a MoFlo XDP flow cytometry (Beckman Coulter, Inc.) using a 488 nm excitation and a 515 nm filter for fluorescein detection and a 600 nm filter for PI detection.

**miRNA-940 target gene prediction.** GOMir was used to identify potential human

miRNA-940 target genes. GOMir integrates miRNA target prediction and functional analysis by combining the predicted target genes from TargetScan, miRanda, RNAhybrid and PicTar 4-way databases and provides a full gene description and functional analysis for each target gene. Only those genes that were predicted by all of the tools and have confirmed roles in development, differentiation, proliferation, cell growth or cell cycle by previous studies were considered as candidates. We assumed that the consensus among databases that predicted any given gene as a target indicated the likelihood that the miRNA-mRNA interaction would be relevant [2].

Since TOF was a manifestation of abnormal heart development, we focus those predicted genes that have been shown to affect heart development. GOMir identified JARID2 as potential target genes for miRNA-940 and JARID2 has been shown to regulate outflow tract morphogenesis. So we focus on JARID2 for the downstream analysis. Two independent strategies were used to confirm these predicted genes as the targets of miRNA-940. First, a luciferase reporter assay was used to confirm the target gene. For construction of the luciferase reporter plasmid of JARID2, a 1103 bp fragment which contains predicted target binding site (according to <http://pictar.mdc-berlin.de>) in 3' UTR of JARID2 was amplified from human genomic DNA by PCR using primers (JARID2 primer: F: 5'-ACTAGTCACTATGCATCTGTTCCAGG-3'; R: 5'-AAGCTTGTGCAGAGCAGCGCTAATAA-3') and inserted into the 3'UTR of a cytomegalovirus-driven firefly luciferase gene. The predicted binding site (CCTGCCT and CTGCCTA) in 3' UTR of JARID2 was deleted as a contrast. HEK293 cells were

transfected with luciferase reporter plasmids and the miRNA-940 mimics (30nM), and a Renilla luciferase plasmid was cotransfected as an internal control. Cells were harvested 48 h after transfection. Luciferase activities were measured using dual luciferase reporter assay system (Promega). Relative luciferase expression was measured on a scintillation counter by using a dual luciferase reporter system. Second, to confirm that miRNA-940 could endogenously regulate JARID2 expression, hCMPCs were transfected with miRNA-940 mimics, miRNA-940 inhibitor or negative control. After 48h, the protein expression level of JARID2 was detected by western blot (R&D, USA). JARID2 protein levels were further examined in human tissues follow the methods mentioned above.

## **Reference**

1. Liu J, van Mil A, Vrijssen K, et al. MicroRNA-155 prevents necrotic cell death in human cardiomyocyte progenitor cells via targeting RIP1. *J Cell Mol Med* 2011;15:1474-82.
2. Ventura A, Young AG, Winslow MM, et al. Targeted deletion reveals essential and overlapping functions of the miR-17 through 92 family of miRNA clusters. *Cell* 2008;132:875-86.

## Supplemental Figure Legends

**Supplemental Figure 1.** Islet-1 staining of Sca-1<sup>+</sup> hCMPCs. Isolated Sca-1<sup>+</sup> hCMPCs was stained for Islet-1 (Isl-1), and DAPI. Merge shows the Sca-1<sup>+</sup> hCMPC expressed Islet-1, a marker of cardiac progenitor cells derived from the second heart field ( $\times 200$ ).

**Supplemental Figure 2.** Efficiency of the miRNA-940 transfection. (A) FAM staining showed the transfected cells of a typical field under the microscope ( $\times 100$ ). (B) Quantification of RT-PCR results examining the miRNA-940 expression after cells transfected with control, miRNA-940 mimics and inhibitor, n=6.

**Supplemental Figure 3.** miRNA-940 mimics and inhibitor do not affect human cardiomyocyte progenitor cells viability. Cell viability was assayed and quantified by measuring CCK-8 absorbance, n=7.

**Supplemental Figure 4.** miRNA-940 mimics and inhibitor do not cause apoptosis and necrosis. Annexin V (X-axis) and PI (Y-axis) staining for (A) Mock; (B) miRNA-940 mimics (30 nM); (C) miRNA-940 inhibitors treatments (30 nM) are shown. UL, upper left; UR, upper right; LL, lower left; LR, low right.

**Supplemental Figure 5.** miRNA-940 expression during hCMPC differentiation. Quantification of miRNA-940 expression during inducing hCMPCs differentiate to

cardiomyocytes at 8 different time points. RT-PCR was performed for 4 to 6 times at each time point.

**Supplemental Figure 6.** miRNA-940 mimics and inhibitor do not affect cardiac-specific gene expression under differentiation condition. Relative mRNA levels of (A) GATA4; (B) MEF2C; (C) Nkx2.5; (D)  $\beta$ -MHC; (E) cActin; (F) TropT as assessed by qRT-PCRs, n=5.

**Supplemental Figure 7.** Effects of miRNA-940 mimics and inhibitor on differentiation of hCMPCs to cardiomyocyte. (A) Representative  $\alpha$ -actinin and NKX2.5 staining pictures of miRNA-940 mimics and inhibitor transfected human cardiomyocyte progenitor cell under differentiation condition ( $\times 200$ ). (B) Quantification of miRNA-940 mimics and inhibitor on the degree of human cardiomyocyte progenitor cell differentiation.

**Supplemental Figure 8.** Effects of miRNA-940 mimics and inhibitors on differentiation of hCMPCs to smooth muscle cells. (A) Relative mRNA levels of  $\alpha$ -SMA. (B) Relative mRNA levels of calponin. (C) Representative Western-Blot results for the effects of miRNA-940 on  $\alpha$ -SMA and calponin protein expression. (D&E) Relative protein levels of  $\alpha$ -SMA (D) and calponin (E). Similar results were observed in 5 independent experiments. \*P < 0.05, compared to control.

**Supplemental Figure 9.** Effects of miRNA-940 mimics and inhibitor on hCMPCs migration as assayed by the chamber assay. (A) Representative images showing the effects of miRNA-940 on hCMPCs migration. (B) Quantification of the effects of the miRNA-940 on hCMPCs migration . \*P < 0.05, compared to mock. mock, n=5; mimics, n=5; inhibitor, n=5.



# Figure S1

DAPI

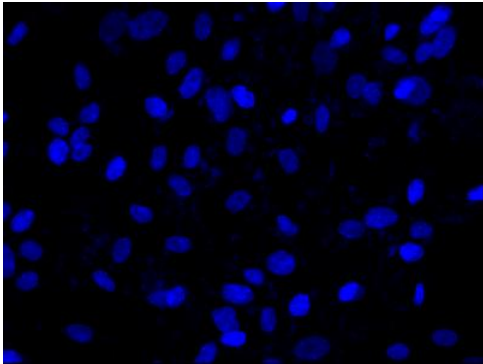

Isl-1

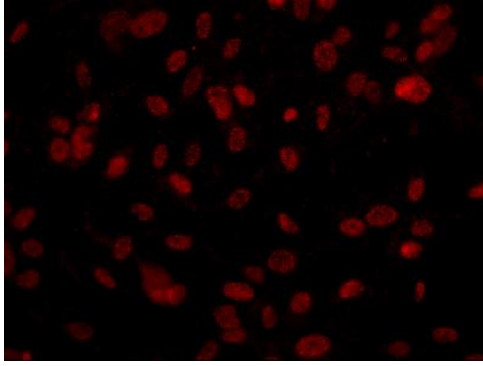

Merged

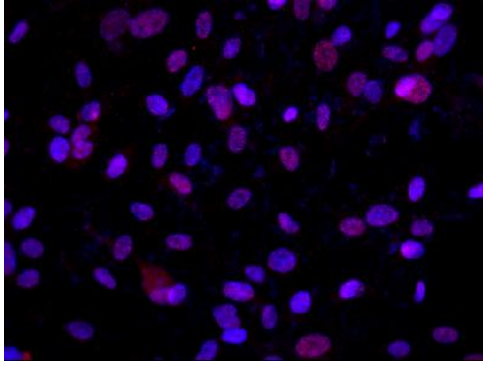

# Figure S2

**A**

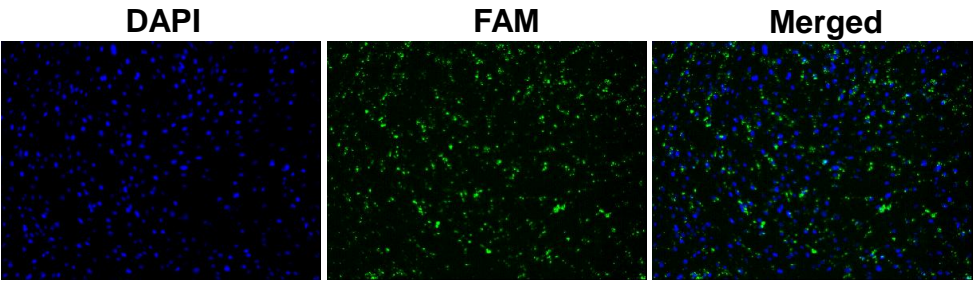

**B**

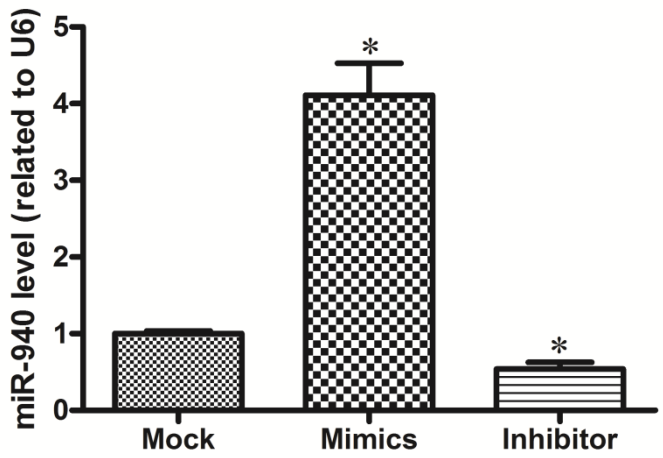

**Figure S3**

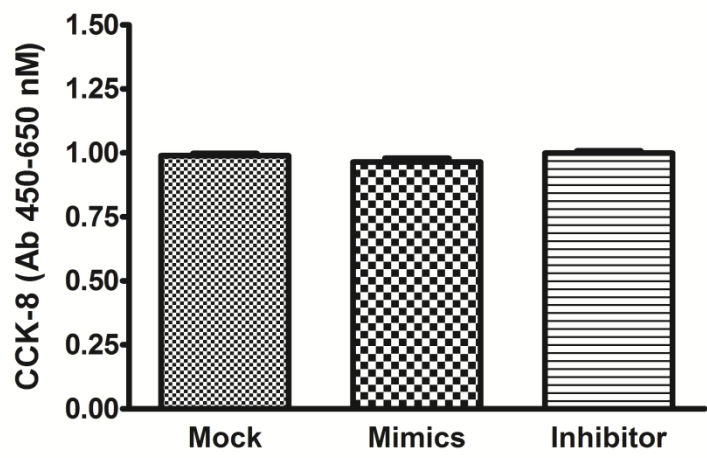

# Figure S4

**A**

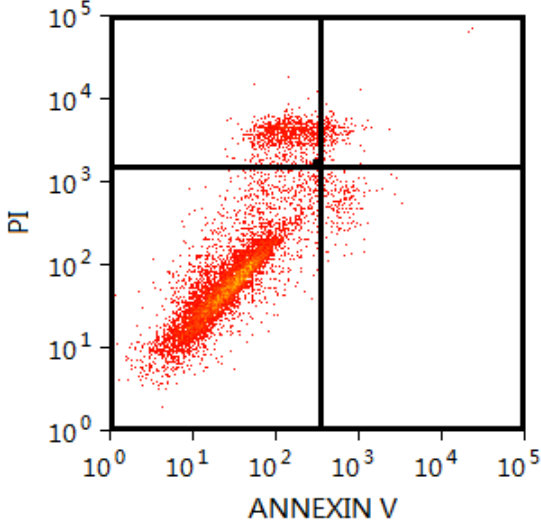

| <u>Quad % Gated</u> |       |
|---------------------|-------|
| UL                  | 10.12 |
| UR                  | 1.83  |
| LL                  | 86.13 |
| LR                  | 1.92  |

**B**

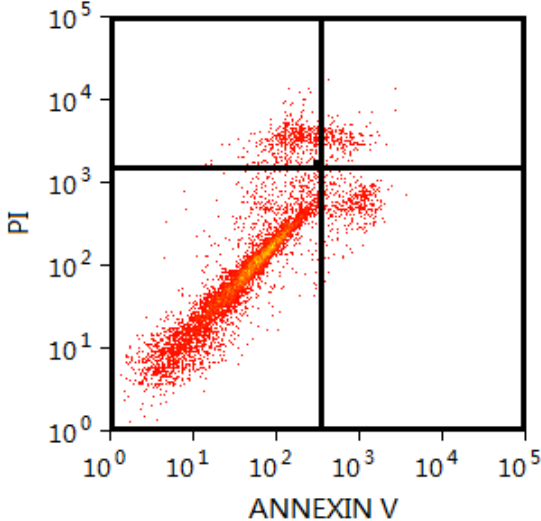

| <u>Quad % Gated</u> |       |
|---------------------|-------|
| UL                  | 5.78  |
| UR                  | 2.30  |
| LL                  | 87.46 |
| LR                  | 4.46  |

**C**

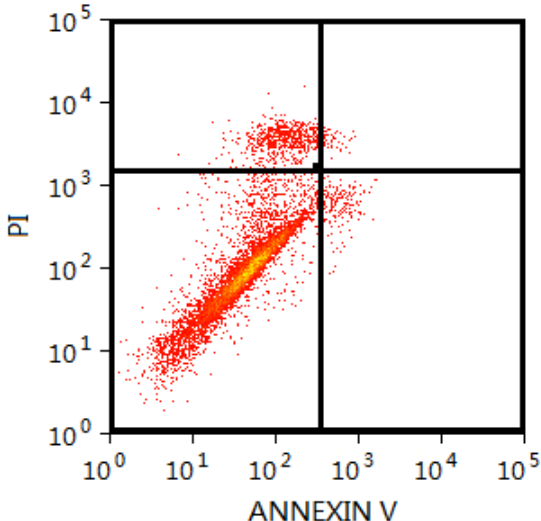

| <u>Quad % Gated</u> |       |
|---------------------|-------|
| UL                  | 8.33  |
| UR                  | 0.56  |
| LL                  | 89.16 |
| LR                  | 1.95  |

Figure S5

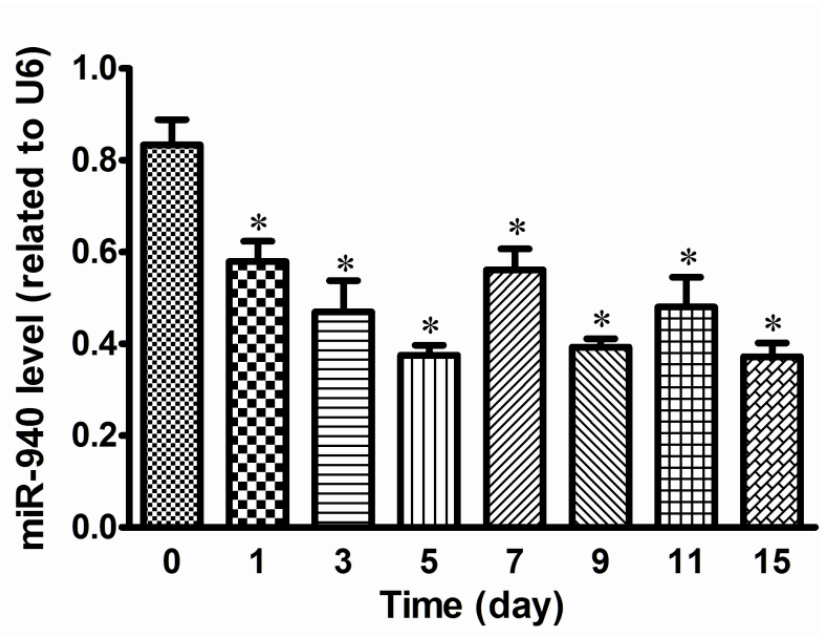

# Figure S6

## A

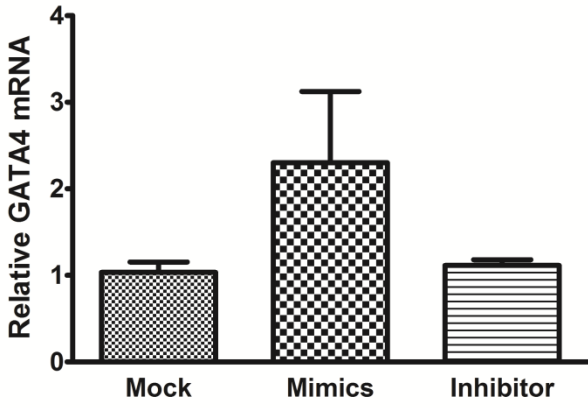

## B

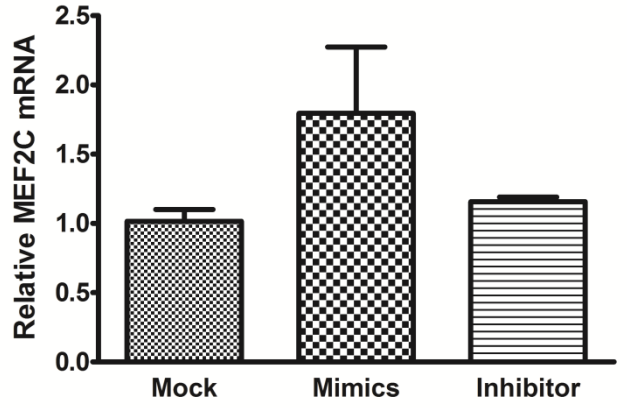

## C

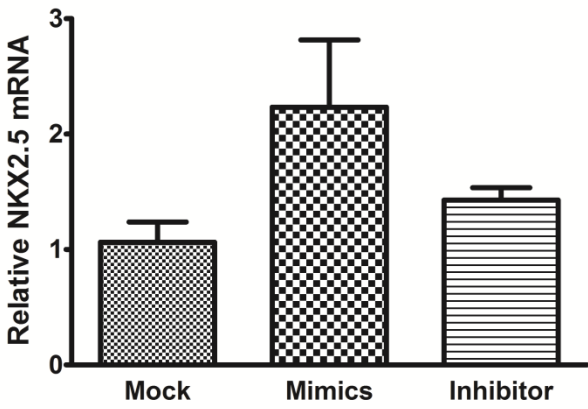

## D

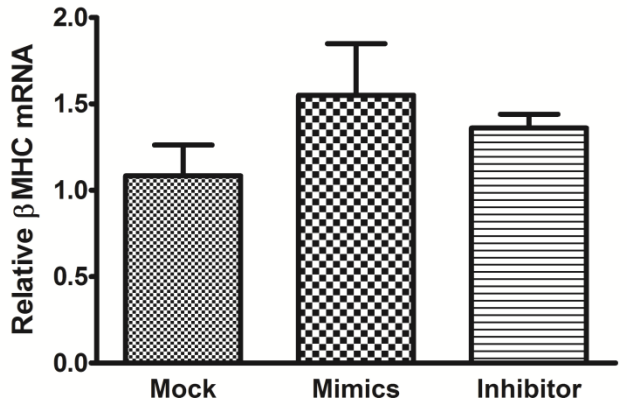

## E

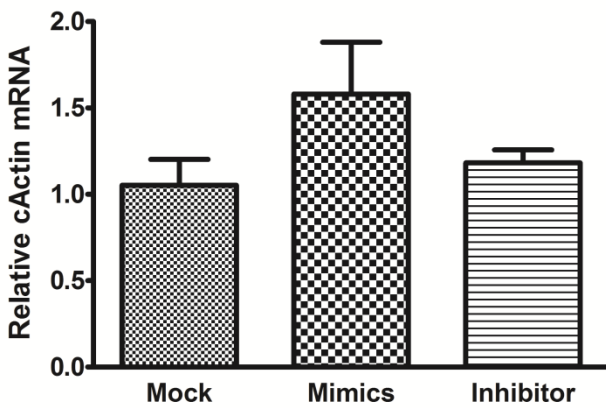

## F

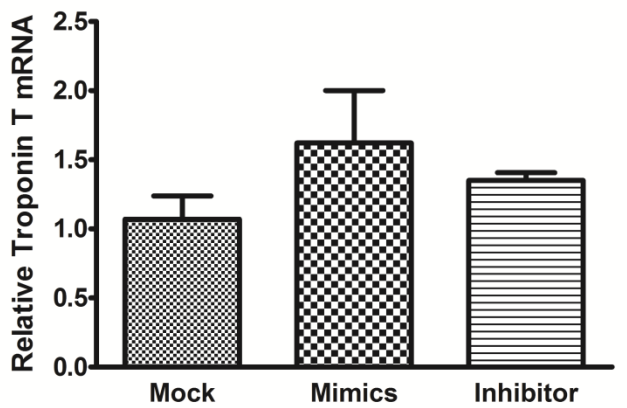

# Figure S7

## A

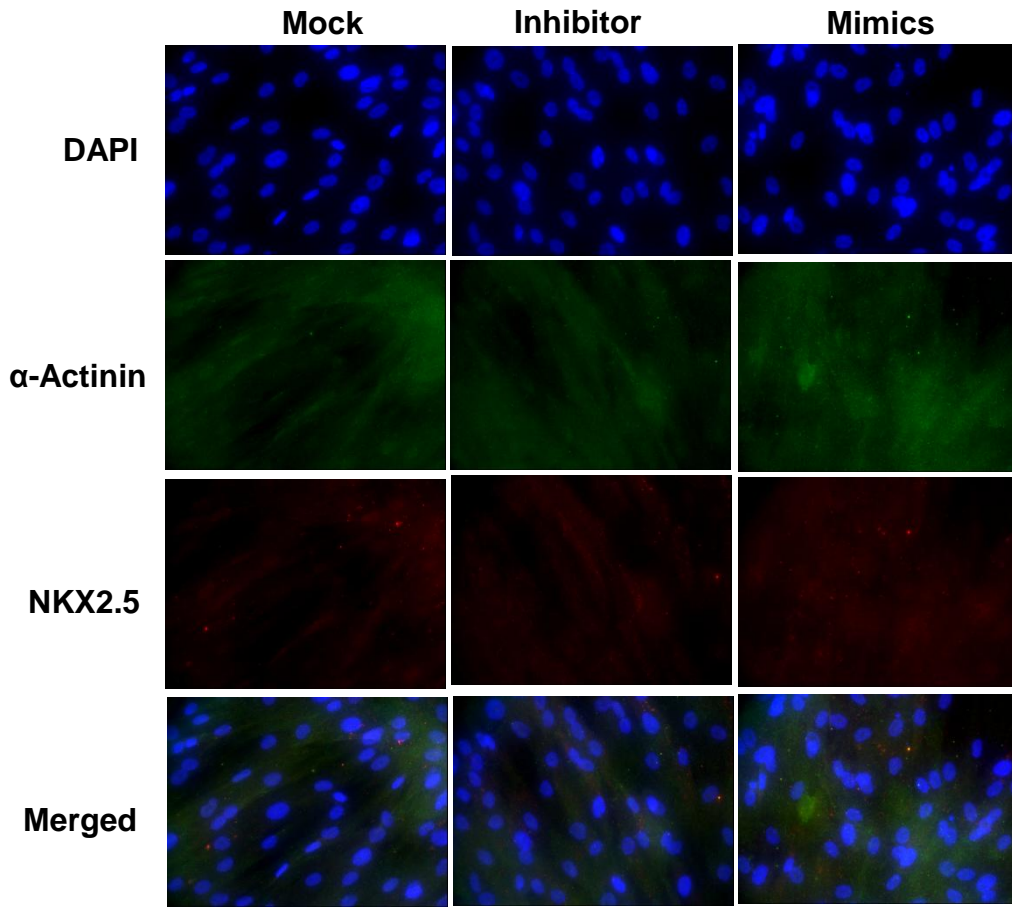

## B

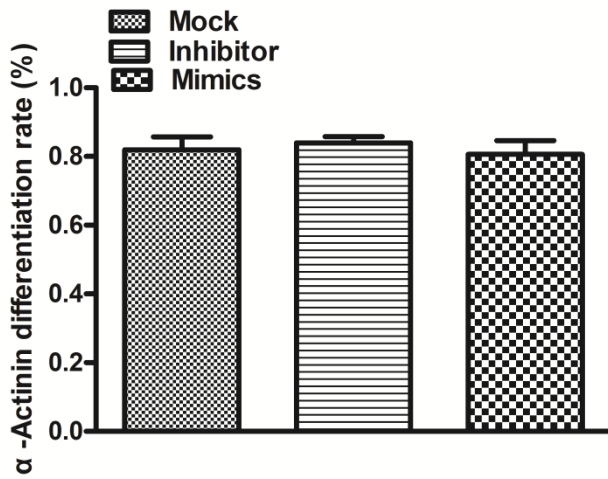

## C

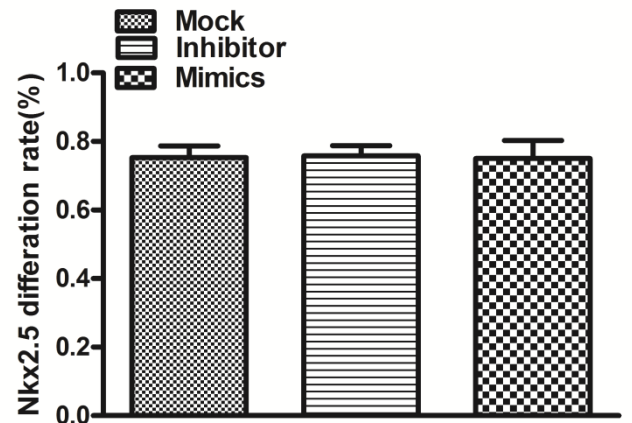

# Figure S8

## A

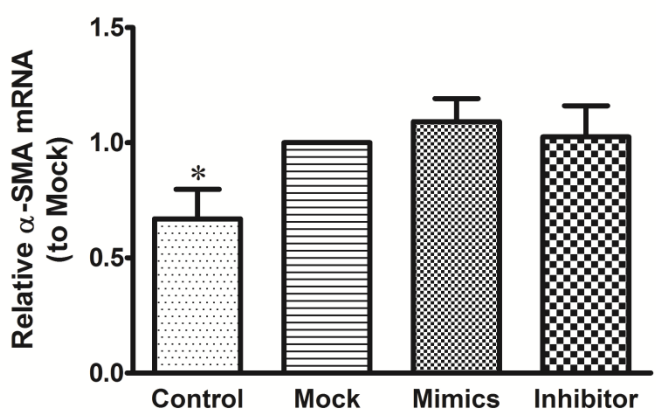

## B

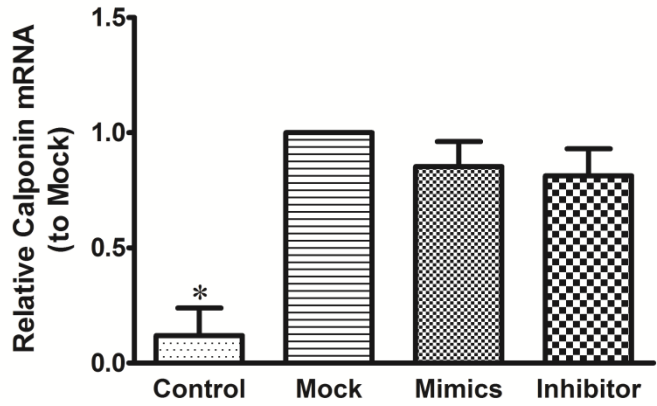

## C

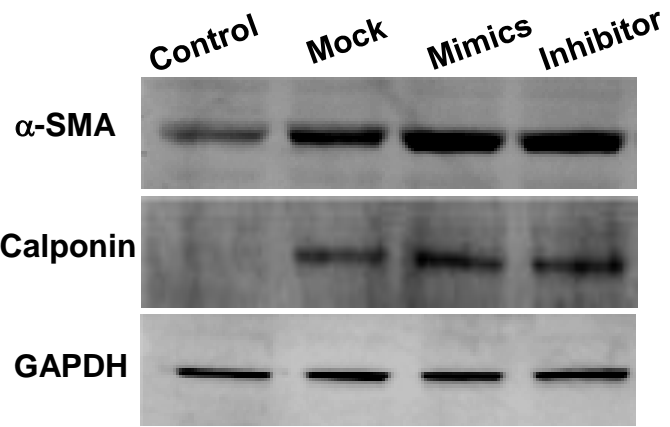

## D

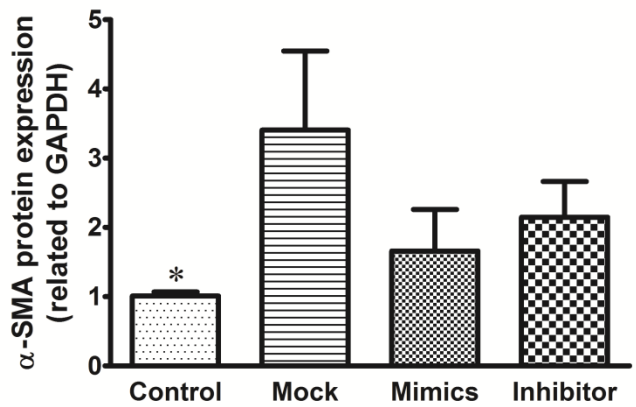

## E

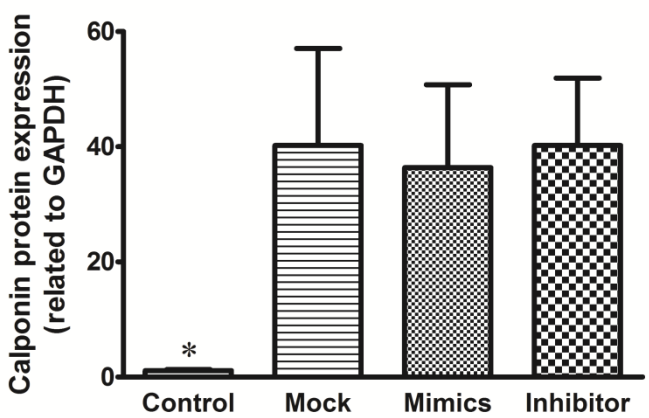



**Figure S9**

**A**

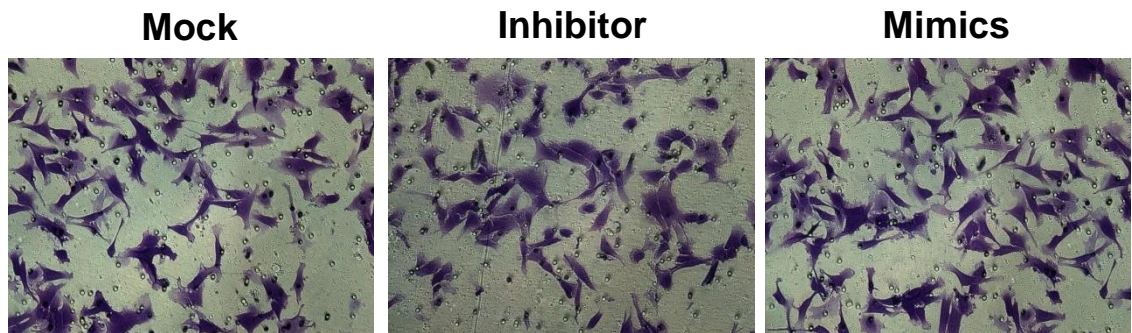

**B**

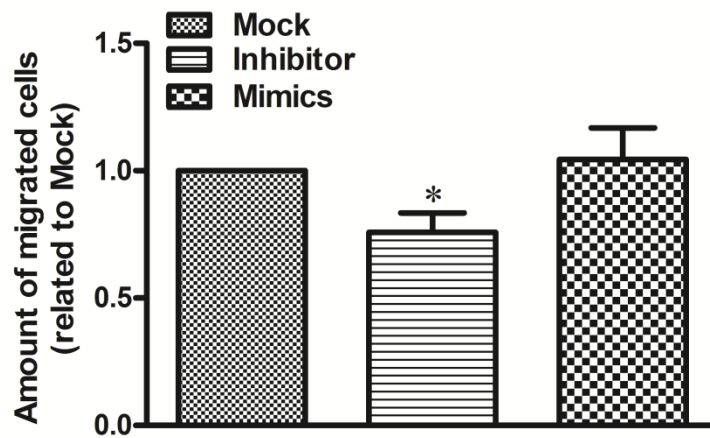

**Supplementary Table 1** Differentially expressed miRNAs between Tetralogy of Fallot patients and healthy controls

| <b>Systematic Name</b> | <b>P value</b> | <b>Fold Change</b> | <b>Regulation</b> |
|------------------------|----------------|--------------------|-------------------|
| hsa-miR-940            | 0.000          | 4.028              | Down              |
| hsa-miR-10a            | 0.015          | 2.562              | Down              |
| hsa-miR-134            | 0.000          | 2.498              | Down              |
| hsa-miR-451            | 0.027          | 1.984              | Down              |
| hsa-miR-144*           | 0.037          | 1.751              | Down              |
| hsa-miR-136            | 0.000          | 1.733              | Down              |
| hsa-miR-148a           | 0.004          | 1.677              | Down              |
| hsa-miR-1281           | 0.001          | 1.618              | Down              |
| hsa-miR-886-3p         | 0.013          | 1.574              | Down              |
| hsa-miR-193a-3p        | 0.002          | 1.556              | Down              |
| hsa-miR-365            | 0.003          | 1.551              | Down              |
| hsa-miR-193a-5p        | 0.006          | 1.478              | Down              |
| hsa-miR-377            | 0.002          | 1.424              | Down              |
| hsa-miR-193b           | 0.001          | 1.419              | Down              |
| hsa-miR-1207-5p        | 0.015          | 1.399              | Down              |
| hsa-miR-720            | 0.001          | 1.375              | Down              |
| hsa-miR-127-3p         | 0.005          | 1.360              | Down              |
| hsa-miR-139-5p         | 0.014          | 1.351              | Down              |
| hsa-miR-376c           | 0.004          | 1.322              | Down              |
| hsa-miR-30c-1*         | 0.013          | 1.318              | Down              |
| hsa-miR-584            | 0.004          | 1.313              | Down              |
| hsa-miR-376a           | 0.006          | 1.307              | Down              |
| hsa-miR-299-5p         | 0.032          | 1.292              | Down              |
| hsa-miR-381            | 0.027          | 1.279              | Down              |
| hsa-miR-574-5p         | 0.004          | 1.274              | Down              |
| hsa-miR-22             | 0.041          | 1.264              | Down              |

|                 |       |       |      |
|-----------------|-------|-------|------|
| hsa-miR-654-3p  | 0.025 | 1.225 | Down |
| hsa-miR-204     | 0.000 | 3.624 | Up   |
| hsa-miR-181a-2* | 0.000 | 2.105 | Up   |
| hsa-miR-221*    | 0.050 | 2.059 | Up   |
| hsa-miR-222     | 0.006 | 2.047 | Up   |
| hsa-miR-155     | 0.000 | 2.018 | Up   |
| hsa-miR-513a-5p | 0.012 | 2.003 | Up   |
| hsa-miR-146b-5p | 0.003 | 1.903 | Up   |
| hsa-miR-130b    | 0.002 | 1.635 | Up   |
| hsa-miR-21      | 0.001 | 1.561 | Up   |
| hsa-miR-224     | 0.047 | 1.559 | Up   |
| hsa-miR-34b*    | 0.026 | 1.525 | Up   |
| hsa-miR-132     | 0.001 | 1.504 | Up   |
| hsa-miR-598     | 0.010 | 1.461 | Up   |
| hsa-miR-744     | 0.003 | 1.423 | Up   |
| hsa-miR-625     | 0.000 | 1.408 | Up   |
| hsa-miR-769-5p  | 0.002 | 1.383 | Up   |
| hsa-miR-887     | 0.039 | 1.362 | Up   |
| hsa-miR-497     | 0.000 | 1.357 | Up   |
| hsa-miR-181c    | 0.003 | 1.352 | Up   |
| hsa-miR-23b     | 0.001 | 1.349 | Up   |
| hsa-miR-28-5p   | 0.004 | 1.304 | Up   |
| hsa-miR-320c    | 0.000 | 1.303 | Up   |
| hsa-miR-129-3p  | 0.010 | 1.298 | Up   |
| hsa-miR-34a     | 0.034 | 1.289 | Up   |
| hsa-miR-652     | 0.034 | 1.285 | Up   |
| hsa-miR-27b     | 0.001 | 1.281 | Up   |
| hsa-miR-24      | 0.001 | 1.275 | Up   |
| hsa-miR-185     | 0.002 | 1.248 | Up   |

|                 |       |       |    |
|-----------------|-------|-------|----|
| hsa-miR-320b    | 0.003 | 1.245 | Up |
| hsa-miR-148b    | 0.001 | 1.243 | Up |
| hsa-miR-194     | 0.031 | 1.238 | Up |
| hsa-miR-324-5p  | 0.002 | 1.236 | Up |
| hsa-miR-93      | 0.006 | 1.229 | Up |
| hsa-miR-320d    | 0.023 | 1.224 | Up |
| hsa-miR-195     | 0.019 | 1.191 | Up |
| hsa-miR-130a    | 0.005 | 1.191 | Up |
| hsa-miR-320a    | 0.000 | 1.190 | Up |
| hsa-miR-125b    | 0.008 | 1.184 | Up |
| hsa-miR-505     | 0.004 | 1.177 | Up |
| hsa-miR-125b-2* | 0.005 | 1.162 | Up |
| hsa-miR-331-3p  | 0.032 | 1.159 | Up |
| hsa-miR-423-5p  | 0.008 | 1.156 | Up |
| hsa-miR-99b     | 0.048 | 1.151 | Up |
| hsa-miR-374b    | 0.011 | 1.148 | Up |
| hsa-miR-361-5p  | 0.023 | 1.144 | Up |
| hsa-miR-140-3p  | 0.018 | 1.128 | Up |
| hsa-miR-186     | 0.009 | 1.112 | Up |
| hsa-miR-151-3p  | 0.042 | 1.106 | Up |

---

**Supplementary Table 2** microRNAs differentially expressed in the heart, pancreas and lung

| <b>Systematic Name</b> | <b>P value</b> | <b>Heart<br/>(Mean <math>\pm</math>SD)</b> | <b>Pancreas<br/>(Mean <math>\pm</math>SD)</b> | <b>Lung<br/>(Mean <math>\pm</math>SD)</b> |
|------------------------|----------------|--------------------------------------------|-----------------------------------------------|-------------------------------------------|
| hsa-miR-1              | 0.000          | 22137 $\pm$ 2578                           | 34 $\pm$ 31                                   | 54 $\pm$ 3                                |
| hsa-miR-940            | 0.000          | 11252 $\pm$ 782                            | 497 $\pm$ 74                                  | 156 $\pm$ 16                              |
| hsa-let-7a             | 0.000          | 7087 $\pm$ 256                             | 13221 $\pm$ 1387                              | 12536 $\pm$ 350                           |
| hsa-let-7f             | 0.006          | 5566 $\pm$ 519                             | 7376 $\pm$ 575                                | 7749 $\pm$ 635                            |
| hsa-miR-625*           | 0.000          | 5424 $\pm$ 585                             | 157 $\pm$ 38                                  | 68 $\pm$ 20                               |
| hsa-miR-26a            | 0.000          | 4412 $\pm$ 405                             | 6544 $\pm$ 441                                | 7617 $\pm$ 258                            |
| hsa-let-7c             | 0.000          | 3804 $\pm$ 142                             | 10223 $\pm$ 190                               | 8358 $\pm$ 421                            |
| hsa-miR-4274           | 0.000          | 3720 $\pm$ 385                             | 119 $\pm$ 30                                  | 126 $\pm$ 7                               |
| hsa-miR-3172           | 0.000          | 3653 $\pm$ 686                             | 932 $\pm$ 119                                 | 165 $\pm$ 7                               |
| hsa-miR-126            | 0.000          | 2976 $\pm$ 161                             | 628 $\pm$ 53                                  | 5030 $\pm$ 200                            |
| hsa-miR-23b            | 0.000          | 2724 $\pm$ 236                             | 1829 $\pm$ 174                                | 1531 $\pm$ 98                             |
| hsa-miR-1238           | 0.000          | 2502 $\pm$ 465                             | 94 $\pm$ 50                                   | 95 $\pm$ 15                               |
| hsa-let-7d             | 0.000          | 2438 $\pm$ 228                             | 5523 $\pm$ 118                                | 4850 $\pm$ 346                            |
| hsa-miR-484            | 0.000          | 2354 $\pm$ 212                             | 152 $\pm$ 64                                  | 188 $\pm$ 20                              |
| hsa-miR-1825           | 0.000          | 2210 $\pm$ 780                             | 201 $\pm$ 41                                  | 147 $\pm$ 11                              |
| hsa-miR-4281           | 0.000          | 1714 $\pm$ 55                              | 704 $\pm$ 123                                 | 1937 $\pm$ 45                             |
| hsa-miR-23a            | 0.001          | 1608 $\pm$ 116                             | 908 $\pm$ 112                                 | 1415 $\pm$ 141                            |
| hsa-miR-133a           | 0.000          | 1418 $\pm$ 162                             | 57 $\pm$ 24                                   | 48 $\pm$ 17                               |
| hsa-miR-1237           | 0.000          | 1395 $\pm$ 377                             | 77 $\pm$ 42                                   | 100 $\pm$ 5                               |
| hsa-miR-133b           | 0.000          | 1254 $\pm$ 93                              | 46 $\pm$ 17                                   | 38 $\pm$ 7                                |
| hsa-miR-1913           | 0.001          | 1069 $\pm$ 491                             | 168 $\pm$ 53                                  | 137 $\pm$ 18                              |
| hsa-miR-499-5p         | 0.001          | 915 $\pm$ 73                               | 16 $\pm$ 6                                    | 25 $\pm$ 21                               |
| hsa-let-7e             | 0.001          | 831 $\pm$ 96                               | 1161 $\pm$ 62                                 | 1331 $\pm$ 53                             |
| hsa-miR-638            | 0.000          | 829 $\pm$ 85                               | 3208 $\pm$ 158                                | 2427 $\pm$ 208                            |
| hsa-miR-27b            | 0.000          | 824 $\pm$ 102                              | 886 $\pm$ 74                                  | 380 $\pm$ 23                              |

|                |       |         |           |           |
|----------------|-------|---------|-----------|-----------|
| hsa-miR-143    | 0.003 | 756±53  | 551±81    | 912±79    |
| hsa-miR-4284   | 0.000 | 690±163 | 103±27    | 77±10     |
| hsa-miR-1281   | 0.002 | 681±285 | 300±13    | 183±10    |
| hsa-miR-1249   | 0.000 | 552±58  | 87±36     | 122±12    |
| hsa-miR-1826   | 0.000 | 532±51  | 4895±444  | 990±50    |
| hsa-miR-1979   | 0.000 | 458±26  | 7066±596  | 1050±50   |
| hsa-let-7g     | 0.000 | 359±28  | 984±38    | 909±87    |
| hsa-miR-145    | 0.001 | 322±25  | 398±116   | 880±52    |
| hsa-miR-486-5p | 0.004 | 267±25  | 123±58    | 491±35    |
| hsa-let-7i     | 0.000 | 261±22  | 609±35    | 907±93    |
| hsa-miR-30d    | 0.000 | 260±7   | 413±37    | 784±42    |
| hsa-miR-16     | 0.000 | 248±14  | 879±71    | 3265±34   |
| hsa-miR-195    | 0.000 | 242±22  | 506±67    | 882±22    |
| hsa-miR-26b    | 0.000 | 225±10  | 734±61    | 1129±25   |
| hsa-miR-3196   | 0.000 | 17724   | 2191±261  | 2046±113  |
| hsa-miR-451    | 0.000 | 171±17  | 419±61    | 10284±311 |
| hsa-miR-1975   | 0.000 | 166±6   | 1594±60   | 936±46    |
| hsa-miR-2861   | 0.000 | 138±9   | 976±176   | 721±42    |
| hsa-miR-92a    | 0.000 | 137±23  | 1047±54   | 968±32    |
| hsa-miR-191    | 0.000 | 134±7   | 258±45    | 574±88    |
| hsa-miR-15b    | 0.000 | 128±13  | 243±49    | 943±50    |
| hsa-miR-21     | 0.000 | 122±11  | 355±66    | 2717±309  |
| hsa-miR-762    | 0.000 | 97±9    | 216±36    | 535±33    |
| hsa-miR-1915   | 0.000 | 93±1    | 875±161   | 567±45    |
| hsa-miR-1308   | 0.000 | 53±5    | 473±108   | 186±2     |
| hsa-miR-217    | 0.000 | 51±5    | 500±16    | 21±3      |
| hsa-miR-1246   | 0.000 | 48±23   | 67±36     | 1665±124  |
| hsa-miR-375    | 0.000 | 37±13   | 12461±527 | 102±2     |
| hsa-miR-148a   | 0.000 | 28±6    | 3116±495  | 53±4      |

|              |       |     |          |         |
|--------------|-------|-----|----------|---------|
| hsa-miR-200c | 0.000 | 8±7 | 3903±743 | 1611±11 |
|--------------|-------|-----|----------|---------|

---
